# Supplementary material for: Trichuris trichiura (Linnaeus, 1771) From Human and Non-human Primates: Morphology, Biometry, Host Specificity, Molecular Characterization, and Phylogeny
Source: Front Vet Sci. 2021 Feb 9;7:626120. doi: 10.3389/fvets.2020.626120 (PMC7934208; doi:10.3389/fvets.2020.626120)
Supplement: Supplementary file 2 [file Table_2.docx]

**Table S2.** Sequences of *Trichuris* spp. and outgroups species obtained from GenBank and used for phylogenetic analysis. * Samples analyzed in the present study. The new ITS2 sequences from this study underlined are the haplotypes used to make the ribosomal concatenated phylogenetic tree.

| Species | Host species/ Geographical origin | Marker | Accession number |
| --- | --- | --- | --- |
| *Trichuris colobae* | *Colobus guereza kikuyensis*/Spain | *cox*1 | HE653116 |
| HE653118 |
| JF690968 |
| *Colobus guereza kikuyensis*/Italy | MK762948 |
| *Trichuris* sp. | *Chlorocebus aethiops*/Italy | MK762929 |
| MK762931 |
| *Chlorocebus sabaeus*/Czech Republic | MK762923 |
| MK762924 |
| MK762925 |
| MK762927 |
| *Colobus guereza kikuyensis*/Czech Republic | JF690968 |
| *Homo sapiens*/Czech Republic | JF690962 |
| *Macaca fuscata*/Europe | MK762905 |
| MK762906 |
| MK762908 |
| MK762909 |
| MK762915 |
| MK762919 |
| MK762920 |
| MK762921 |
| *Papio anubis*/USA | KT449825 |
| *Papio hamadryas*/Czech Republic | JF690963 |
| *Papio hamadryas*/Denmark | KT449824 |
| *Papio hamadryas*/Europe | MK762943 |
| MK762945 |
| *Trichuris trichiura* | *Chlorocebus aethiops*/Spain | LR898048* |
| *Erythrocebus patas*/Spain | LR898049* |
| *Homo sapiens*/China | GU385218 |
| NC_017750 |
| *Homo sapiens*/Uganda | KT449826 |
| *Homo sapiens* /Japan | AP017704 |
| *Macaca sylvanus*/Spain | LR130781 |
| LR130782 |
| LR130783 |
| LR130784 |
| *Papio papio*/Spain | LR898050* |
| *Papio* sp./Spain | HG003692 |
| *Trichuris suis* | *Sus scrofa*/China | NC_017747 |
| *Sus scrofa domestica*/Spain | HE653124 |
| *Sus scrofa domestica*/Denmark | KT449822 |
| *Sus scrofa domestica*/Uganda | KT449823 |
| *Sus scrofa domestica*/China | HQ204208 |
| HQ204210 |
| HQ204209 |
| GU070737 |
| *Sus scrofa scrofa*/Spain | HE653127 |
| *Trichuris ursinus* | *Papio ursinus*/South Africa | LT627353 |
| *Trichuris colobae* | *Colobus guereza kikuyensis*/Spain | *co*b | LM994704 |
| MK914578 |
| *Trichuris* sp. | *Chlorocebus aethiops*/Italy | MK914564 |
| MK914570 |
| MK914571 |
| *Chlorocebus sabaeus*/Czech Republic | MK914562 |
| MK914563 |
| *Macaca fuscata/*Europe | MK914550 |
|  | MK914551 |
|  | MK914554 |
|  | MK914555 |
|  | MK914556 |
|  | MK914557 |
|  | MK914560 |
| *Papio anubis*/USA | KT449825 |
| *Papio hamadryas*/Czech Republic | MK914573 |
| MK914574 |
| MK914575 |
| MK914576 |
| MK914577 |
| *Papio hamadryas*/Denmark | KT449824 |
| *Papio* sp./Spain | LM994703 |
| *Trichuris trichiura* | *Chlorocebus aethiops*/Spain | LR898051* |
| *Erythrocebus patas*/Spain | LR898052* |
| *Homo sapiens*/China | GU385218 |
| NC_017750 |
| *Homo sapiens*/Uganda | KT449826 |
| *Macaca sylvanus*/Spain | LR132031 |
| LR132032 |
| LR132033 |
| LR132034 |
| LR757999* |
| *Papio papio*/Spain | LR898053* |
| LR898054* |
| LR898055* |
| LR898056* |
| *Trichuris suis* | *Sus scrofa*/China | NC_017747 |
| *Sus scrofa domestica*/China | GU070737 |
| *Sus scrofa domestica*/Denmark | KT449822 |
| *Sus scrofa domestica*/Uganda | KT449823 |
| *Sus scrofa scrofa*/Spain | LM994696 |
| *Trichuris ursinus* | *Papio ursinus*/South Africa | LT627357 |
| LT627358 |
| LT627359 |
| LT627360 |
| *Trichuris colobae* | *Colobus guereza kikuyensis*/Spain | *rrn*L | MN088583 |
| MN088584 |
| MN088585 |
| *Colobus guereza kikuyensis*/Spain | LR898058* |
| LR898059* |
| LR898060* |
| LR898061* |
| LR898062* |
| *Trichuris* sp. | *Chlorocebus aethiops*/Italy | MN088565 |
| *Chlorocebus sabaeus*/Czech Republic | MN088559 |
| MN088560 |
| MN088561 |
| *Chlorocebus sabaeus*/Saint Kitts and Nevis | KU524595 |
| KU524599 |
| KU524600 |
| KU524601 |
| KU524602 |
| *Macaca fuscata*/Italy | MN088542 |
| MN088543 |
| MN088544 |
| MN088546 |
| MN088551 |
| MN088553 |
| MN08855 |
| MN088557 |
| *Papio anubis*/USA | KT449825 |
| *Papio hamadryas*/Czech Republic | MN088578 |
| MN088580 |
| *Papio hamadryas*/Denmark | KT449824 |
| *Papio* sp./Denmark | KU524558 |
| KU524559 |
| KU524564 |
| KU524573 |
| KU524574 |
| KU524575 |
| KU524576 |
| KU524581 |
| KU524584 |
| *Trachypithecus francoisi*/China | KC481232 |
| KC481233 |
| KC481234 |
| KC481235 |
| KC461179 |
| *Trichuris trichiura* | *Homo sapiens*/China | GU385218 |
| NC_017750 |
| AM993017 |
| AM993018 |
| AM993019 |
| AM993020 |
| *Homo sapiens*/Ecuador | KP781898 |
| KP781899 |
| KP781900 |
| KP781901 |
| KP781906 |
| *Homo sapiens*/Uganda | KT449826 |
| KU524541 |
| KU524542 |
| KU524544 |
| KU524545 |
| KU524548 |
| KU524557 |
| *Macaca sylvanus*/Spain | LR898063* |
| LR898064* |
| LR898065* |
| LR898066* |
| LR898067* |
| *Papio papio*/Spain | LR898057* |
| *Trichuris suis* | *Sus scrofa*/China | NC_017747 |
| *Sus scrofa domestica*/China | GU070737 |
| *Sus scrofa domestica*/Denmark | KT449822 |
| *Sus scrofa domestica*/Ecuador | KP781894 |
| *Sus scrofa domestica*/Uganda | KT449823 |
| KU524537 |
| KU524540 |
| *Trichuris colobae* | *Colobus guereza kikuyensis*/Spain | ITS2 | FM991956 |
| *Nomascus gabriellae*/Spain | FM991955 |
| *Trichuris* sp. | *Chlorocebus aethiops*/China | KT344827 |
| *Macaca leonina*/China | KT344828 |
| *Macaca mulatta*/China | MH390369 |
| KT344829 |
| *Nomascus leucogenys*/China | KT344830 |
| *Papio anubis*/China | KT344826 |
| *Papio hamadryas*/China | KT344831 |
| *Papio ursinus*/South Africa | GQ301551 |
| *Rhinopithecus roxellana*/China | KT344825 |
| *Trachypithecus francoisi*/China | KT186231 |
| KT186232 |
| KT186233 |
| KT186234 |
| *Trichuris trichiura* | *Cercopithecus ascanius*/Uganda | KJ588135 |
| *Cercopithecus lhoesti*/Uganda | KJ588163 |
| *Cercopithecus mitis*/Uganda | KJ588156 |
| *Chlorocebus aethiops*/Spain | LR898026* |
| LR898027* |
| LR898028* |
| LR898029* |
| LR898030* |
| *Colobus guereza*/Uganda | KJ588167 |
| *Erythrocebus patas*/Spain | LR898031* |
| *Homo sapiens*/Cameroon | GQ301555 |
| *Homo sapiens*/China | AM992987 |
| *Homo sapiens*/Uganda | JN181859 |
| *Lophocebus albigena*/Uganda | KJ588147 |
| *Macaca sylvanus*/Spain | LR535741 |
| LR535747 |
| LR535749 |
| LR535750 |
| LR898025* |
| *Pan troglodytes*/Uganda | KJ588160 |
| *Papio anubis*/Uganda | KJ588152 |
| *Papio hamadryas*/Turkey | KC877992 |
| *Papio papio*/Spain | LR898032* |
| LR898033* |
| LR898034* |
| LR898035* |
| LR898036* |
| *Procolobus rufomitratus*/Uganda | KJ588162 |
| *Trichuris suis* | *Sus scrofa*/China | AM992999 |
| *Sus scrofa domestica*/Spain | AJ249966 |
| *Trichuris ursinus* | *Papio ursinus*/South Africa | GQ301554 |
| *Trichuris colobae* | *Colobus guereza kikuyensis*/Spain | ITS1 | FM991956 |
| *Nomascus gabriellae*/Spain | FM991955 |
| *Trichuris* sp. | *Chlorocebus aethiops*/China | KT344827 |
| *Macaca leonina*/China | KT344828 |
| *Macaca mulatta*/China | KT344829 |
| MH390369 |
| *Nomascus leucogenys*/China | KT344830 |
| *Papio anubis*/China | KT344826 |
| *Papio hamadryas*/China | KT344831 |
| *Papio ursinus*/South Africa | GQ301551 |
| *Rhinopithecus roxellana*/China | KT344825 |
| *Trachypithecus francoisi*/China | KT186231 |
| KT186232 |
| KT186233 |
| KT186234 |
| *Trichuris trichiura* | *Cercopithecus ascanius*/Uganda | KJ588097 |
| *Cercopithecus lhoesti*/Uganda | KJ588102 |
| *Cercopithecus mitis*/Uganda | KJ588104 |
| *Chlorocebus aethiops*/Spain | LR898012* |
| LR898013* |
| *Colobus guereza*/Uganda | KJ588076 |
| *Erythrocebus patas*/Spain | LR898014* |
| *Homo sapiens*/Cameroon | GQ301555 |
| *Homo sapiens*/China | AM992987 |
| *Homo sapiens*/Uganda | KJ588075 |
| *Lophocebus albigena*/Uganda | KJ588096 |
| *Macaca sylvanus*/Spain | LR898004* |
| LR898005* |
| LR898006* |
| LR898007* |
| LR898008* |
| LR898009* |
| *Pan troglodytes*/Uganda | KJ588094 |
| *Papio anubis*/Uganda | KJ588099 |
| *Papio hamadryas*/Turkey | KC877992 |
| *Papio papio*/Spain | LR898010* |
| LR898011* |
| *Procolobus rufomitratus*/Uganda | KJ588122 |
| *Trichuris suis* | *Sus scrofa*/China | AM992999 |
| *Sus scrofa domestica*/Spain | AJ781762 |
| *Trichuris ursinus* | *Papio ursinus*/South Africa | GQ301554 |
| **Outgroup species (mitochondrial)** | | | |
| *Trichinella pseudospiralis* |  |  | KM357411 |
| *Trichinella spiralis* |  |  | AF293969 |
| **Outgroup species (ribosomal)** | | | |
| *Trichinella nativa* |  |  | KP307966 |
| *Trichinella spiralis* |  |  | KC006415 |
